# Supplementary material
Source: publisher site journal article supplement (https://www.kjim.org/upload/media/kjim-2023-276-Supplementary-Fig-1.pdf)
Supplement: Supplementary file 1 [file kjim-2023-276-Supplementary-Fig-1.pdf]

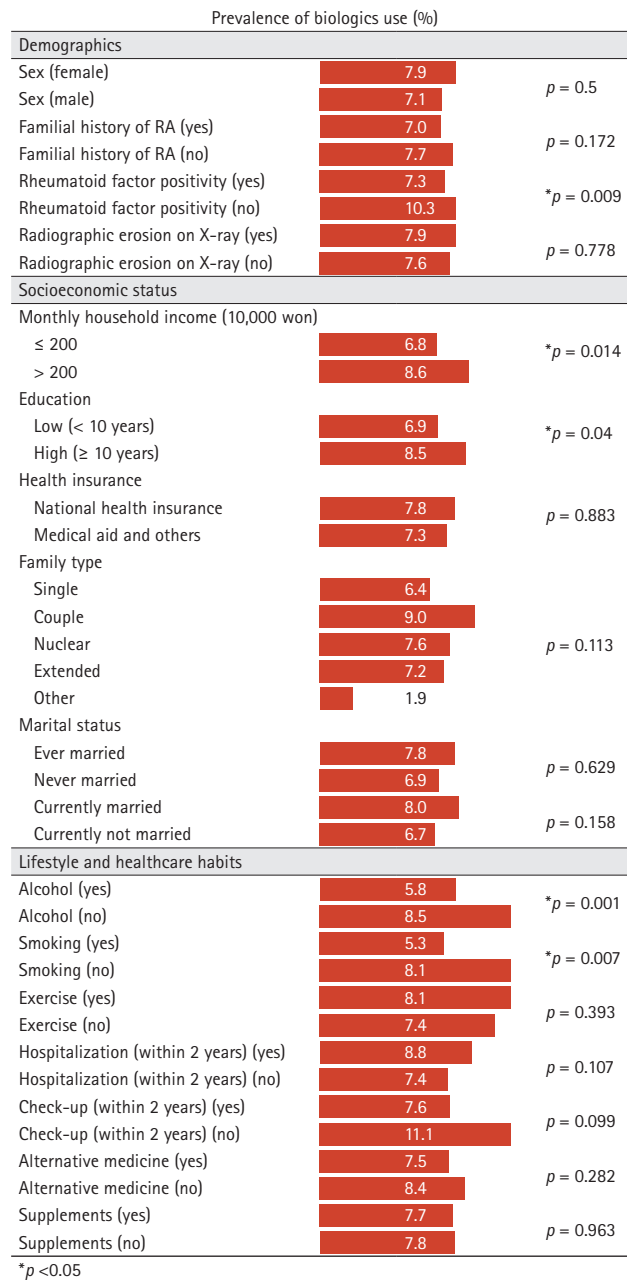

**Supplementary Figure 1.** Prevalence of biologics use and statistical differences among demographic variables.
